# Supplementary material for: Crosslinking Mechanism on a Novel Bacillus cereus Transglutaminase-Mediated Conjugation of Food Proteins
Source: MDPI journal article supplement (doi:10.3390/foods11223722), 2022-11-19
Supplement: s1 [file s1]

## Supplementary material

### Crosslinking mechanism on a novel *Bacillus cereus* transglutaminase-mediated conjugation of food proteins

Hongbin Wang<sup>1,†</sup>, Yuanfu Zhang<sup>1,†</sup>, Zhaoting Yuan<sup>1</sup>, Xiaotong Zou<sup>1</sup>, Yuan Ji<sup>1</sup>, Jiayi Hou<sup>1</sup>, Jinfang Zhang<sup>2,\*</sup>,

Fuping Lu<sup>1</sup>, Yihan Liu<sup>1,\*</sup>

<sup>1</sup> Key Laboratory of Industrial Fermentation Microbiology, Ministry of Education, The College of Biotechnology, Tianjin University of Science and Technology, Tianjin 300457, China

<sup>2</sup> Tianjin Key Laboratory of Industrial Microbiology, Tianjin 300457, China

<sup>†</sup> Hongbin Wang and Yuanfu Zhang contributed equally to this work.

\* Corresponding author:

E-mail address: lyh@tust.edu.cn (Y. H. Liu); jfzhang1992@sohu.com (J. F. Zhang).

Tel.: +86-022-6060-2949 (Y. H. Liu); +86-022-6060-1958 (J. F. Zhang)

**Table S1. Primers used in this study.**

| <b>Primers</b>  | <b>Sequences</b>                                    |
|-----------------|-----------------------------------------------------|
| bamtg-F-NcoI    | CATG <u>CCATGGG</u> CATTATCATATCCGGCCAAGT           |
| bamtg-R-HindIII | CCC <u>AAGCTT</u> ATGCATGATCTGATAAAGCG              |
| bcetg-F-NcoI    | CATG <u>CCATGGG</u> CATTGTAATAGGCCGTTCTATTGTAC      |
| bcetg-R-NotI    | AAGGAAAAAAG <u>CGGCCGC</u> ATAAACTGTAGTTGTGTTGCCAAC |
| bsatg-F-NcoI    | CATG <u>CCATGGG</u> CATTATCCTTTCAGGAAAGCC           |
| bsatg-R-HindIII | CCC <u>AAGCTT</u> GCTGCCAAACATTTGCC                 |
| bartg-F-NcoI    | CATG <u>CCATGGG</u> CATTAAAGTTAACCAACAAATTGTG       |
| bartg-R-HindIII | CCC <u>AAGCTT</u> AGCTACATACGTAATCGACCC             |

Underline indicated restriction recognition sites.

```

BSUTG : MIVSGQLLR FQDIENWQ-I DQNLPLRE MIETPVQFD HSIADHREL KIMAVYAN KIDRSKARG IIPKTYGT TIRVNSPEA ELKXVMP KIDRIANG PPTECATA IVIYHILU DTICEDRNA SDRITIT : 149
BAMTG : MIVISGAVLR FQDIANWQ-I EKSLPTINE LLNSPVQFD OSIADHREL KIMAVYAN KIDRSKARG IIPKTYGT TIRVNSPEA ELKXVMP KIDRIANG PPTECATA IVIYHILU KILCEANR RROITIT : 149
BCETG : MIVIGRSIVH PYITNEYEPF ANEQQTST MAGNQEITS RTSGLSDH NIVYHITS LEFGSSFGF RFGQSFQF QIKRTSLG FLLPNIPS IIPDIFNG KIMTECATA MIVFVRL ALYDEENR LKANLLIT : 150
BSATG : MIVLSGKPTT NEGLASFQ-L EGKRTIMQ IQASNDTFR RQSIDHREL TISNIDNA RDNSSKARG IIGRSRND ATRVSEGA ELKXVVE RPDIFNG SKITECATA IVIYHILU QTVDEENR RRSLLIT : 149
BARTG : MIVNQIYK ISDLNRS-L TREKADLRQ MDAYREYVE ATFDQSDH SVLQHESS VLDSSKARG IIGRSRNG KIKRTDNG FLLPTVSH QIPDIFNG HETECATA VILFVRLV NNLKANENR LADLVIT : 149

BSUTG : EYEH-LPIY ETSHEFLGD LVFNDFPD QKATRGEN VILLEDKF AHGCLNCK QITDNLSPF KKCAISAIL LSQAVLVP SFRIVR----- : 245
BAMTG : EYEH-LPIY ETSHEFLGD LVFNDFPD QKATRGEN VILLEDKF AHGCLNCK QITDNLSPF KKCAISAIL LSQAVLVP SFRIVR----- : 245
BCETG : DYQDQLLI KTSGLVFGD LVFNDFPD NATITRGEN TIVNDFY GHGCLNCK EITDNLSPF VPVAFIAHL IDTIRLISR LSYHASPST PQTSIGPIPI RDDAIVATVG NITTVY : 276
BSATG : EYDT-LPIY ETSHEFLGD LVFNDFPD YQSTRGEN VILLEDKF AHGCLNCK EITDNLSPF VPVAFIAHL IDTIRLISR LSYHASPST PQTSIGPIPI RDDAIVATVG NITTVY : 246
BARTG : QYEDQLIHG YKSDYLFGD LAVFNDFPD DTPTRGEN TIVNDFY GHGCLNCK EITDNLSPF VPVAFIAHL IDTIRLISR LSYHASPST PQTSIGPIPI RDDAIVATVG NITTVY : 271

```

**Figure S1.** Multiple alignments analysis of protein sequences for BAMT, BCETG, BSATG, and BARTG with software DNAMAN. The similar amino acids were labeled in grey and the identical amino acids were highlighted in solid black. The active sites were presented in yellow color.

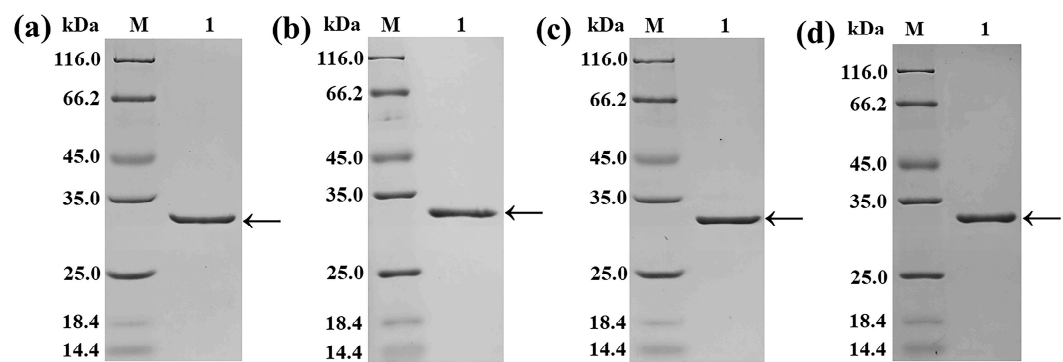

**Figure S2.** The purified rTGs analyzed using SDS-PAGE. (a) Purified BAMTG. (b) Purified BCETG. (c) Purified BSATG. (d) Purified BARTG. Lane M: Standard protein ladder; Lane 1: purified BAMTG, BCETG, BSATG, and BARTG.

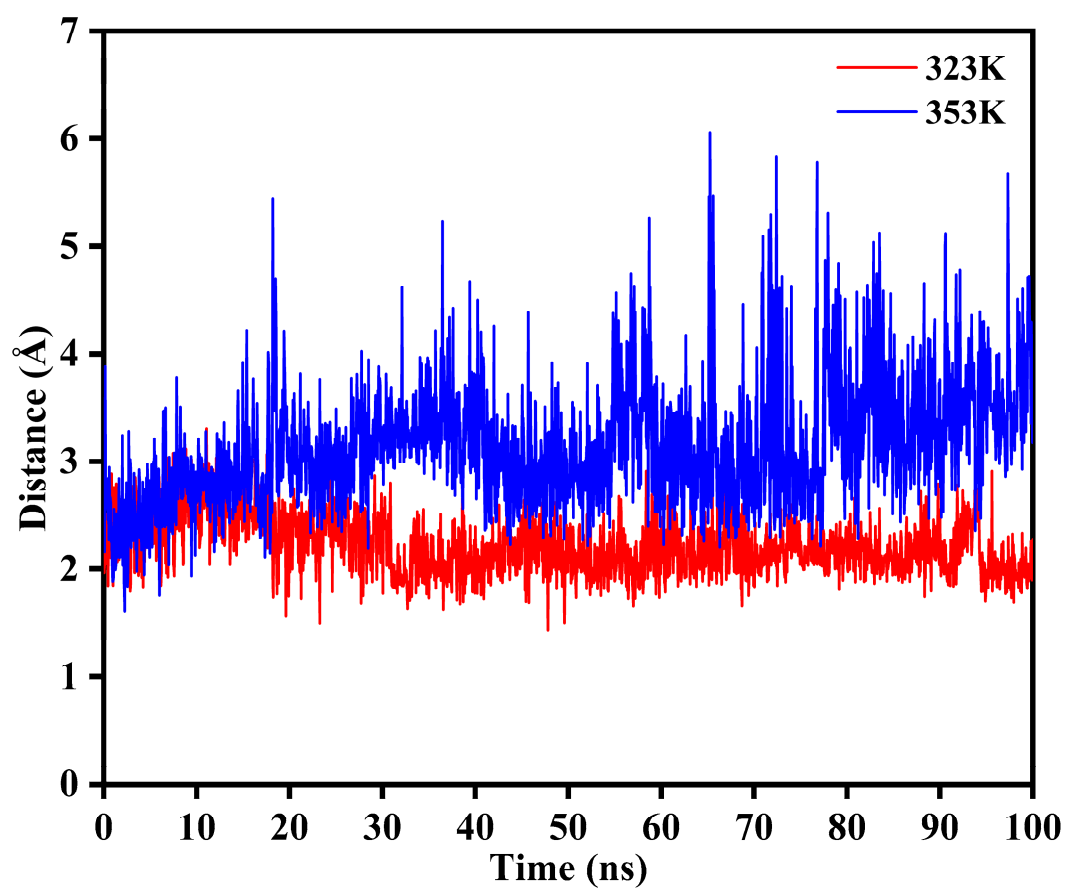

**Figure S3.** Distance between the active center of BCETG and MDC as a function of time (100 ns) at 323 K and 353 K.

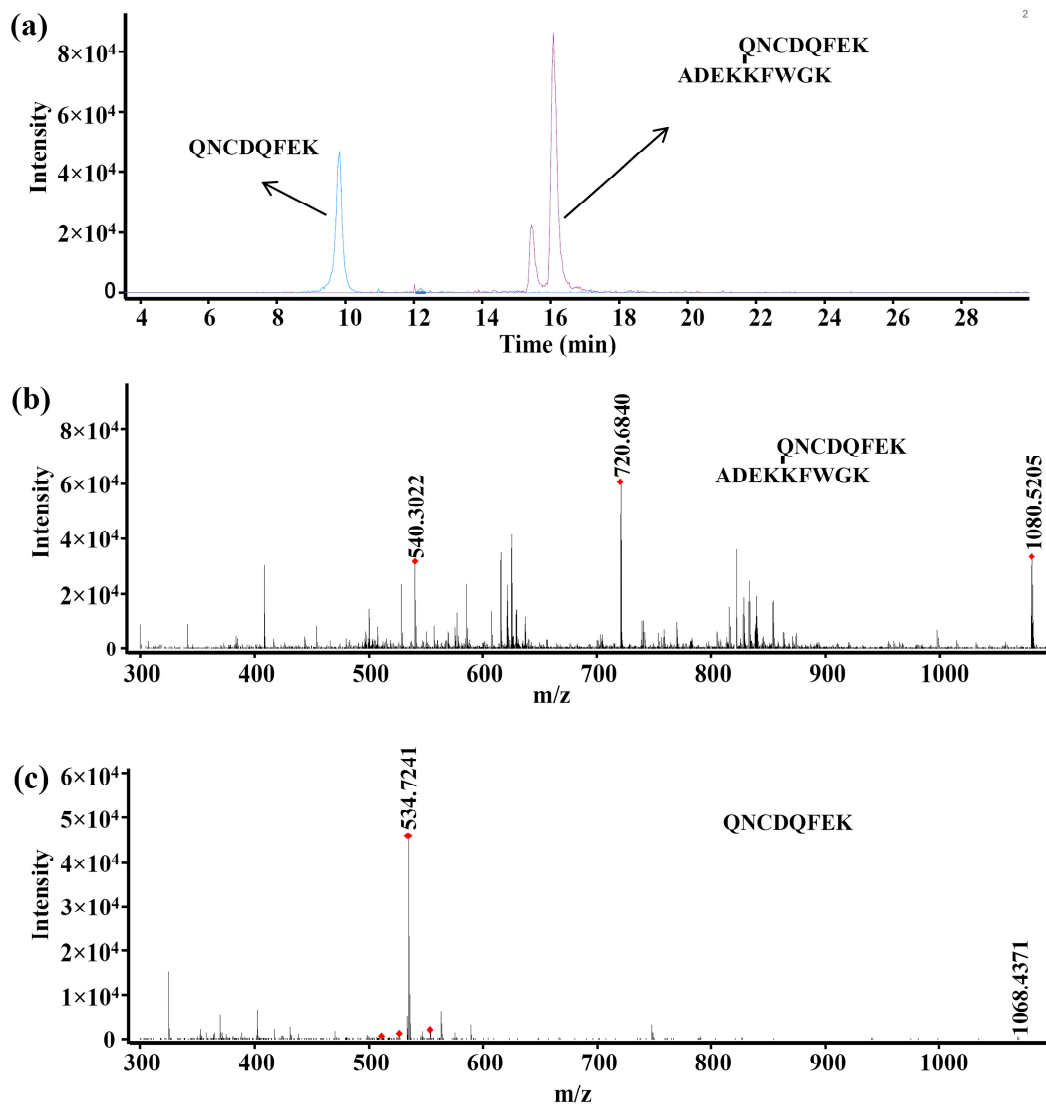

**Figure S4.** LC-MS evaluation of the cross-linked peptides of ADEKKFWGK and QNCDQFEK from cross-linked BSA. (a) EIC of the cross-linked peptides ADEKKFWGK-QNCDQFEK and QNCDQFEK. (b) Mass spectrum of cross-linked peptide ADEKKFWGK-QNCDQFEK. (c) Mass spectrum of peptide QNCDQFEK.
